# Supplementary material for: Fine mapping and identification of the fuzzless gene GaFzl in DPL972 (Gossypium arboreum)
Source: PubMed Central journal article supplement (PMC6647196; doi:10.1007/s00122-019-03330-3), 2019-04-02
Supplement: 122_2019_3330_MOESM1_ESM.pdf [file 122_2019_3330_MOESM1_ESM.pdf]

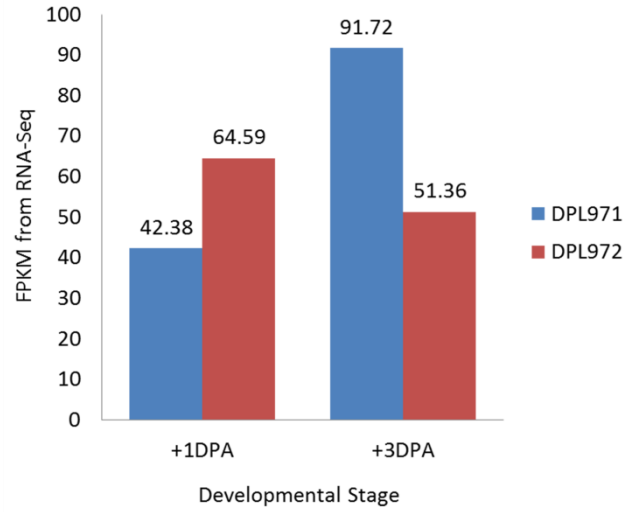

**Fig. S1** Expression levels of *GaGL2* in DPL971 and DPL972 during different developmental stages. Data were obtained from RNA-Seq.
