# Supplementary material for: Fine mapping and identification of the fuzzless gene GaFzl in DPL972 (Gossypium arboreum)
Source: PubMed Central journal article supplement (PMC6647196; doi:10.1007/s00122-019-03330-3), 2019-04-02
Supplement: 122_2019_3330_MOESM2_ESM.pdf [file 122_2019_3330_MOESM2_ESM.pdf]

TableS1 Information of BSA-seq data

| Sample ID     | Clean-Base     | Q30(%) | Total_reads | Mapped(%) | Properly_mapped(%) | Ave_depth | Cov_ratio1X(%) |
|---------------|----------------|--------|-------------|-----------|--------------------|-----------|----------------|
| DPL971P1      | 53,736,668,700 | 90.96  | 358244458   | 97.98     | 81.8               | 31        | 64.59          |
| DPL972P2      | 60,905,420,400 | 91.22  | 406036136   | 97.79     | 82.27              | 35        | 64.75          |
| FuzzyPool1    | 60,910,934,100 | 90.82  | 406072894   | 98        | 81.43              | 35        | 64.85          |
| FuzzlessPool2 | 53,419,518,900 | 91.23  | 356130126   | 97.7      | 81.56              | 30        | 64.54          |
