# Supplementary material for: Fine mapping and identification of the fuzzless gene GaFzl in DPL972 (Gossypium arboreum)
Source: PubMed Central journal article supplement (PMC6647196; doi:10.1007/s00122-019-03330-3), 2019-04-02
Supplement: 122_2019_3330_MOESM3_ESM.pdf [file 122_2019_3330_MOESM3_ESM.pdf]

TableS2 Number of SNP detected by the BSA-seq

| Type                  | R04vsR03 | R06vsR05 |
|-----------------------|----------|----------|
| INTERGENIC            | 598,506  | 455,600  |
| INTRON                | 22,934   | 8,937    |
| UPSTREAM              | 51,420   | 20,206   |
| DOWNSTREAM            | 39,499   | 16,212   |
| SPLICE_SITE_ACCEPTOR  | 23       | 10       |
| SPLICE_SITE_DONOR     | 22       | 3        |
| SPLICE_SITE_REGION    | 260      | 51       |
| START_LOST            | 12       | 3        |
| SYNONYMOUS_CODING     | 3,034    | 1,010    |
| NON_SYNONYMOUS_CODING | 4,314    | 1,353    |
| SYNONYMOUS_STOP       | 4        | 2        |
| STOP_GAINED           | 115      | 47       |
| STOP_LOST             | 7        | 2        |
| Other                 | 142      | 115      |
| Total                 | 720,292  | 503,551  |

Note: R3: Fuzzy parent DPL971.

R4: Fuzzless parent DPL972.

R5: Bulked pool of 30 extreme fuzzy progenies.

R6: Bulked pool of 30 extreme fuzzless progenies.
