# Supplementary material for: Fine mapping and identification of the fuzzless gene GaFzl in DPL972 (Gossypium arboreum)
Source: PubMed Central journal article supplement (PMC6647196; doi:10.1007/s00122-019-03330-3), 2019-04-02
Supplement: 122_2019_3330_MOESM4_ESM.pdf [file 122_2019_3330_MOESM4_ESM.pdf]

TableS3 Number of InDel detected by the BSA-seq

| Type                              | R04vsR03 | R06vsR05 |
|-----------------------------------|----------|----------|
| INTERGENIC                        | 81,013   | 60,307   |
| INTRON                            | 7,319    | 3,238    |
| UPSTREAM                          | 16,392   | 6,654    |
| DOWNSTREAM                        | 12,189   | 5,036    |
| SPLICE_SITE_ACCEPTOR              | 8        | 5        |
| SPLICE_SITE_DONOR                 | 23       | 11       |
| SPLICE_SITE_REGION                | 83       | 51       |
| START_LOST                        | 8        | 1        |
| FRAME_SHIFT                       | 372      | 180      |
| CODON_DELETION                    | 57       | 17       |
| CODON_INSERTION                   | 82       | 29       |
| CODON_CHANGE_PLUS_CODON_DELETION  | 41       | 16       |
| CODON_CHANGE_PLUS_CODON_INSERTION | 18       | 16       |
| STOP_GAINED                       | 11       | 3        |
| STOP_LOST                         | 6        | 2        |
| Other                             | 26       | 22       |
| Total                             | 117,648  | 75,588   |

Note: R3: Fuzzy parent DPL971.

R4: Fuzzless parent DPL972.

R5: Bulked pool of 30 extreme fuzzy progenies.

R6: Bulked pool of 30 extreme fuzzless progenies.
