# Supplementary material for: Fine mapping and identification of the fuzzless gene GaFzl in DPL972 (Gossypium arboreum)
Source: PubMed Central journal article supplement (PMC6647196; doi:10.1007/s00122-019-03330-3), 2019-04-02
Supplement: 122_2019_3330_MOESM5_ESM.pdf [file 122_2019_3330_MOESM5_ESM.pdf]

TableS4 Details of all designed markers in the fine mapping region of A08

| Primer Name | Forward Primer (5'→3')     | Reverse Primer (5'→3')    | Product Length(bp) | Start position(bp) |
|-------------|----------------------------|---------------------------|--------------------|--------------------|
| SSR1        | ATCACCTTGATTGGCACACA       | TAAACAAGCCATGCAAACA       | 209                | 7267               |
| SSR2        | GCATCAATTCATGGTGTCTT       | TGAAATTTCCACTAAGGATGAA    | 235                | 7906               |
| SSR3        | AGGGAAAGAAGCTGAGAGGG       | TTAACTTGGGCCAGATACAAA     | 198                | 8899               |
| SSR4        | TTTGCTTAAGTCTATTCGGTTGA    | GGCTTGAGCTTAACCCGTTT      | 286                | 35886              |
| SSR5        | AATGACACTCTCCCAGCAGAC      | TGAAGTGATGATATGGCACTTTG   | 169                | 36414              |
| SSR6        | TTCTCTGAGCTTCTGGGAT        | GGGACGTCAAGTAAATTAATCCT   | 278                | 61694              |
| SSR7        | AAACAAAGTTGATGGCAAA        | TTGGTTCGCTATCAATCTAAA     | 302                | 68265              |
| SSR8        | TTAAAGGTCCAACATCGCGT       | TGCATGTATAGGTGAATCTTGAGG  | 251                | 78387              |
| SSR9        | GACCATGTTAATGACAACGATGA    | TGCGCACTATCACATACCGT      | 182                | 79010              |
| SSR10       | ACCACATGACACATGGTAATTAGA   | CCAATCAATGCCAGTCAACA      | 133                | 81310              |
| SSR11       | GAATTCCTCACAGCTCCAA        | GTCTCGCTCGATTCTAGG        | 329                | 82272              |
| SSR12       | GGGCCATTAAGCAATAGGGA       | GGGAACCAACGAAGTCAAGT      | 350                | 88280              |
| SSR13       | AAGCATAATAGCCCGTATGACAA    | TTTAAACGGCTTACTTCATGTTGA  | 181                | 88901              |
| SSR14       | CAATCAAGATCTGAACAAAGTCG    | GCTCAAGCTCGACCTGATCT      | 259                | 103185             |
| SSR15       | CTCTCCATTGCCATCACTT        | TGGTTGGTATATGTAGTTGAGGGA  | 225                | 104037             |
| SSR16       | ATATGCATGGACGGATGGAT       | CCGAGTTCGAAGCTGAAAGT      | 190                | 112969             |
| SSR17       | GTGCCAAGAACAAGGAGGAG       | GTGCAATATTCATTGGACCG      | 296                | 114472             |
| SSR18       | CACGAGTGCTAATGGGACAA       | ATCCAGGCAAAATGCGTACT      | 190                | 114727             |
| SSR19       | GCTAACACGCTCAGCAAGTG       | TACTGGTGTCAACGATCCGA      | 293                | 115407             |
| SSR20       | TCGGATCGTTGACACCAGTA       | ATCCTCCTCCTCCTCCTCT       | 195                | 115718             |
| SSR21       | ACGCATAAACGAAGTCAAGCA      | AAATTCAGGAAAGTCAAGCA      | 322                | 115733             |
| SSR22       | ATTCGGATATGCTCAGTGCC       | TTGATGGTTAGTGCAATCCG      | 312                | 130308             |
| SSR23       | CCAATTGGAGAACACAAATTA      | CCTTGGGATTTAGGCTTTCC      | 251                | 133736             |
| SSR24       | GTTTGGTGGCTTTGGTTGGTT      | CGAAGTCAAACCTATATTCTCCAA  | 224                | 135323             |
| SSR25       | TTTGGGAGTACAATTATGTGAAA    | CAAATCATGCTAGTCCCTTTG     | 239                | 139953             |
| SSR26       | CTGTCGATCCCTCCGTGTT        | GATTTCAATGCCTGATCGCT      | 313                | 141729             |
| SSR27       | TCGATGTTATATCAATTAGGTCATTC | CGACTTTAGATCTCATATGGCGT   | 273                | 144282             |
| SSR28       | AAATGCTCCGTTTCCATCG        | CCTTACCTGATTCCCAA         | 267                | 178822             |
| SSR29       | TTTGGGAAATCAGGTGAAGG       | AGCTGAATGAGCAGCAAATG      | 264                | 179193             |
| SSR30       | TGCAAAACCCAGTTATGTGT       | GGTTAAAGGAGATGGGAGGG      | 250                | 189112             |
| SSR31       | GCGAATTTCTACTCTGCAA        | CACACATCAAATCTAATTGGAATAC | 251                | 201766             |
| SSR32       | CTCATCCTCTCCATTGGCAT       | ATCAATTCACATCAAGCC        | 283                | 216626             |
| SSR33       | AAGACGATGAAGAGCACGGT       | GAAAGTCCACAAGCTGTCC       | 205                | 217094             |
| SSR34       | AAATTGTTAAGTTTGGCCGC       | CACTCTGCTCCACCATCAA       | 241                | 217621             |
| SSR35       | TGTCATTCTATCACAGCAGCA      | TTGTTAGCAAGCATTGCTCG      | 282                | 219094             |
| SSR36       | TTGATAAATTCGATTGTTGATTG    | CCCTAGATTGCAATGATGA       | 313                | 234864             |
| SSR37       | GGGAGGGACTATGAGCAGTTC      | AAGTTAAGCCTCATCACATCAA    | 126                | 235763             |
| SSR38       | ATGCTTGAACCTGCCATTA        | TCCCTCAGCAACAATTGAA       | 262                | 251584             |
| SSR39       | AAGATTCAAAGTTAGGACGTATGG   | AAATCTTAAACTCTCGAAATGATTG | 239                | 258303             |
| SSR40       | AGGGAAAGCGTTTCCAGTAA       | ATGAATTCGGCTGTCACTC       | 325                | 266237             |
| SSR41       | CGAAGAGGCTGAAACCCATA       | ATGTTGCAGTTGGTGTGAG       | 341                | 268367             |

|              |                             |                             |            |               |
|--------------|-----------------------------|-----------------------------|------------|---------------|
| SSR42        | TGCATGCCTGATAATAAGCAA       | CAGGGTCTGTTTCAGAAATTT       | 202        | 268972        |
| SSR43        | AGTGAAGAGTCGAATTTGCCA       | AGCTGAATAGTTTGATGCATTATTT   | 298        | 276049        |
| SSR44        | TCACCCACTGTAATCAGTGCTC      | TGGGTTTGAGTGTGCTGAAG        | 173        | 278986        |
| SSR45        | GTGCCAAACAACAATCTCCC        | TGCATGTGGAGTTGAACCAT        | 187        | 280568        |
| SSR46        | TGTTTGATGCGAGTTCACCT        | CATGTGAACCTTCTATTGCTTT      | 254        | 282267        |
| SSR47        | CCCAACATTAGCGGTGTTAG        | GTGAAACGGAGGGAACCTCA        | 137        | 291474        |
| SSR48        | AGCCCAATTAGCCCAACAAC        | GATTTACAGGCTTTGTAGCCG       | 194        | 292801        |
| SSR49        | GGCTGAAATGGGTTAGGTCA        | TTGAAAGTATTTACATCGGATAATGT  | 187        | 298359        |
| SSR50        | GGCTGAAATGGGTTAGGTCA        | TTGAAAGTATTTACATGGGATAATGT  | 187        | 299425        |
| SSR51        | CACGGAAGTACACCCAACCT        | GAGAAGCTACGAATGTCGGC        | 286        | 301593        |
| SSR52        | GGACTAAGACCATTACTACTCCATAG  | TTGAAAGTATTTACATGGGATAATGT  | 273        | 302988        |
| SSR53        | CGGCCAGTTGAATAGGAAAC        | GGCTAAGGCTACTCAATCGC        | 298        | 303757        |
| SSR54        | GCCTTAATCCTCAAATTTCCC       | CCCTAAGTGCCATGTGTGTG        | 250        | 317941        |
| SSR55        | CGAACACACAAAGACCCAAA        | TGAAATTCAAATATGAACACCCAAA   | 296        | 320488        |
| SSR56        | TGACCTTGACCCGAAATAA         | AAATCAAAGTTTATTATGCCAAA     | 149        | 321626        |
| SSR57        | TGATATTGGCGTGGGAACCT        | ATATTTGGCCCTCAACCTTT        | 287        | 322245        |
| SSR58        | TTGCAACTGTGGTACTTACAGC      | GGCATGAAGGAATGCAGATT        | 165        | 329336        |
| SSR59        | CAGTCAGATTGATTGGACTGAGA     | TTGTGCACACCATCACTTGT        | 322        | 341123        |
| SSR60        | TTCTGTCTGGGTTTGCTTT         | CCGGAAGTTTAAGGTTGTGTC       | 281        | 342137        |
| SSR61        | CCGAACCACGTAATCCTTG         | TGAGTACTCAATACTCAAACCTCG    | 227        | 349626        |
| SSR62        | AGCCCATTTGATGCAATCTG        | GCCAAATCGAAATCGAGAAC        | 180        | 357760        |
| SSR63        | CCAAGCTCAAGAGGGAATTG        | CGAATGGAATCGATGAAGGA        | 339        | 361419        |
| SSR64        | TAGCTCATCGGTCCCAGTTT        | GCACGCTGCATACCTACAT         | 228        | 366943        |
| SSR65        | CACTCGGCCATAAATTGAT         | CCGCCAACTTGGAATCTAC         | 289        | 372200        |
| SSR66        | CGGGCCATGAACATCTCTAA        | ACAGTAACAGGCGGTATCGG        | 344        | 374080        |
| SSR67        | ATGCCAGTAGGTGTTGGTCC        | GTCCAGGATACGGTGTGCT         | 337        | 375142        |
| SSR68        | ATGAGGAGGACGAGCAAGAA        | CAGCCTGTGAATCTGATGA         | 255        | 377194        |
| SSR69        | ATGAGGAGGACGAGCAAGAA        | TGCCTTCTCAGAATTCGCT         | 336        | 377214        |
| SSR70        | TTTATGATCCCTTACCCAA         | GCATACAGCTGAATATATTAACACTCA | 216        | 398847        |
| SSR71        | TGAAGGAAGAAGGGATAAATTCA     | AGAGCCAAAGGGTAGTGGGT        | 154        | 419165        |
| SSR72        | TCGATGGTGTATTTGGCTCA        | ATGCTTTGTTCCACAGACA         | 299        | 424052        |
| SSR73        | ATTGTCGGTACAGGAGGACG        | TCCTTGTGCAAGAAGACGTG        | 221        | 424456        |
| SSR74        | AAATCCAAGAGAATTGAGTGATTA    | GTTGCTACTTGCCACGTTGA        | 197        | 425765        |
| SSR75        | CATGTTAGTCGGTTGGTGACA       | TGCAGATCACAGAGAATGGC        | 302        | 437510        |
| SSR76        | TGCCATTCTCTGTGATCTGC        | ATGATTCCAACCCGATTCAA        | 176        | 437770        |
| SSR77        | CTGATTCTCAAGTGGCACGA        | TTGCAAATTCATCTCCCTTTG       | 156        | 440278        |
| SSR78        | GGCACTTGGCATTGTTTCTT        | ACGGCAAAGTTGACGGAATA        | 223        | 444245        |
| SSR79        | CCACAATCAAAGTTAATGCGTA      | GAGCTCTAGTTTAGTCGGGTGG      | 225        | 446768        |
| SSR80        | TCAACTCAATGCACGAGGA         | GCAAACAGCTCTGTGAACGA        | 125        | 455339        |
| SSR81        | CTGAAACCCCTCATTTCAGC        | GGGTCTCTTCGCCGTAGTC         | 157        | 459808        |
| <b>SSR82</b> | <b>CCTTCCATGCATATTGGAAA</b> | <b>CAAAGCACCAATTTCAAGG</b>  | <b>283</b> | <b>469010</b> |
| SSR83        | CACCTTGAAATGGGTGCTT         | GCTTGGTGACCCTCTAGCTG        | 191        | 469261        |
| SSR84        | AGCTAGAGGGTACCAAGCA         | CATCCCACTAGCAGCATTGA        | 162        | 469435        |
| SSR85        | TGTTAATCATGTGATTATTGAGTGTG  | CATGAACTACCACGGGTTT         | 257        | 470082        |

|         |                                    |                                     |     |        |
|---------|------------------------------------|-------------------------------------|-----|--------|
| SSR86   | TGTTGTTAAATTGCTTACTTGGA            | TCGATACCTACCAAGGTTTGAA              | 310 | 485966 |
| SSR87   | TTATTATCCGCCAAACAGC                | AAC TTGGCAGGTGGATTGAT               | 325 | 486744 |
| SSR88   | TCCTATTGCTGGCGAGATT                | AAGTGGCCTGACCATACAC                 | 316 | 490174 |
| SSR89   | TGAACGTATACGAAGATTGGTT             | AAGTGGCCTGACCATACAC                 | 253 | 490296 |
| SSR90   | AATGCCTTACCTTTGAAATGC              | TGGACTTGTTCTTCTTGTTGC               | 136 | 491476 |
| SSR91   | AACAGGAGCATTGATGCAAA               | GCTGTGAAGCTGAGGCTAT                 | 306 | 498723 |
| SSR92   | GTATCTGCAAGGGTGGAGGA               | AAGATACGCAATGGCAAAGC                | 203 | 520481 |
| SSR93   | TTTGAGTTTAAATTGAACGGATTT           | TCTTGGTGGTGGAGTTCACA                | 160 | 544219 |
| SSR94   | TGTGAACTCCACCACCAAGA               | TTCACTACCATCATTCCGGGA               | 259 | 544357 |
| SSR95   | TGTGAACTCCACCACCAAGA               | TTCACTACCATCATTCCGGGA               | 259 | 544421 |
| SSR96   | GGGCAAATGCAATACGAGT                | AACCAATCAGCATAGCCAC                 | 275 | 546417 |
| SSR97   | TTGTTTCGCAACGAATTAATG              | TTAACCTTACTCCTTCGAACCAT             | 237 | 547865 |
| SSR98   | AATTGTGGGATCTGCTGCAT               | TGGCGTGGACATGTACCTTA                | 323 | 551918 |
| InDel1  | GGCTGCCACCCCC                      | CCTCACATTTAACGTCAAGCTCAC            | 356 | 76294  |
| InDel2  | CCAAACATCCATGTGGACCAATTTG          | GGTAATAACTGTCTTTATGAGCCCTTTTC       | 360 | 501736 |
| InDel3  | CATCAACGTGGCAAGTAGCAACA            | CCCAGGGGCAAAAAAATTTGGG              | 372 | 525615 |
| InDel4  | GCCCCTCCAGATTTGCCTC                | GGTCCAAATTGTCTAAAATAAATCCGTAGAGAC   | 565 | 531453 |
| InDel5  | CGAATCCTGAACCCCAAACCTAAAC          | CATCACCATGGCAACAACCTCC              | 376 | 532619 |
| InDel6  | CGCGAGGACTAAAATTTGAAAGTTTGA        | GGTAAGGATTGGGGCATTAACTGG            | 178 | 534201 |
| InDel7  | CCATAATTAGAGTTTCACGTGATAAATTGTACC  | GAGTTTTGTGTCACCACTCAATCG            | 256 | 534829 |
| InDel8  | GGCTTGTGCAGCCATTGTG                | TCGTGCATTA AAAAGAACATGCTAGG         | 377 | 640157 |
| InDel9  | GATTCCCTTTCATCAAATATTCTATGTTAGCG   | ACTCAAATACTTAGTATACCATATTAGCCTCTTTC | 536 | 650514 |
| InDel10 | AGTAGGTGCTACAAAATCAGCTCC           | CTGTTTTAGCATTTTGGGTGCTCTTTTC        | 327 | 664027 |
| InDel11 | CACAACATTTAGTAAATAGAAATTTGGGCAATCC | GGTTATTGACTTGAAGAGGGGGG             | 252 | 666443 |

Note: markers in highlight are polymorphic between two mapping parents.
