# Supplementary material for: Fine mapping and identification of the fuzzless gene GaFzl in DPL972 (Gossypium arboreum)
Source: PubMed Central journal article supplement (PMC6647196; doi:10.1007/s00122-019-03330-3), 2019-04-02
Supplement: 122_2019_3330_MOESM6_ESM.pdf [file 122_2019_3330_MOESM6_ESM.pdf]

TableS5 Information of RNA-seq data

| Sample     | CleanBases<br>(bp) | CleanQ30(%) | Total<br>reads | Read mapping<br>rate | Multiple mapping<br>rate |
|------------|--------------------|-------------|----------------|----------------------|--------------------------|
| DPL971+1R1 | 7,168,622,700      | 95.38       | 23895409       | 91%                  | 5%                       |
| DPL971+1R2 | 6,412,138,500      | 95.4        | 25321633       | 91%                  | 9%                       |
| DPL971+3R1 | 7,571,760,300      | 95.31       | 25239201       | 91%                  | 6%                       |
| DPL971+3R2 | 7,265,123,100      | 95.46       | 23930032       | 91%                  | 5%                       |
| DPL971+5R1 | 7,042,378,500      | 95.27       | 23474595       | 91%                  | 5%                       |
| DPL971+5R2 | 8,017,725,900      | 95.28       | 27254966       | 91%                  | 6%                       |
| DPL972+1R1 | 7,596,489,900      | 95.41       | 21373795       | 91%                  | 7%                       |
| DPL972+1R2 | 8,608,806,300      | 95.46       | 28696021       | 91%                  | 7%                       |
| DPL972+3R1 | 7,179,009,600      | 95.25       | 24217077       | 91%                  | 4%                       |
| DPL972+3R2 | 7,619,923,500      | 95.24       | 25399745       | 91%                  | 5%                       |
| DPL972+5R1 | 8,176,489,800      | 95.51       | 26725753       | 92%                  | 6%                       |
| DPL972+5R2 | 7,619,780,400      | 95.35       | 25399268       | 91%                  | 7%                       |
