# Supplementary material for: Fine mapping and identification of the fuzzless gene GaFzl in DPL972 (Gossypium arboreum)
Source: PubMed Central journal article supplement (PMC6647196; doi:10.1007/s00122-019-03330-3), 2019-04-02
Supplement: 122_2019_3330_MOESM7_ESM.pdf [file 122_2019_3330_MOESM7_ESM.pdf]

TableS6 Sequence information about amplification primers of genes and promoters

| Primer Name | Product Length(bp) | ForwardPrimer (5'→3')                                        | ReversePrimer (5'→3')                                                |
|-------------|--------------------|--------------------------------------------------------------|----------------------------------------------------------------------|
| 11941       | 264                | ATGTCAGTTTCTCCCCTGGAA<br>ATATCG                              | TCAATTGCTTGCCCATTTAGCAGTC                                            |
| 11941P      | 2000               | TCCCAGGTCACTAACAATATT<br>GTCG                                | GACATGCTTGGTGACCCCTCTAG                                              |
| 11942       | 843                | ATGGGTTTTGAAGATTCAGAT<br>AGGGTATC                            | TTAATAAACCTCTAATCCAAATAATACTC<br>CGGCA                               |
| 11942P      | 2000               | CTATGACCATGATTACGCCAA<br>GCTTGTCTATTTTGGTCATTA<br>ACGGGCTAAC | ACCACCCGGGGATCCTCTAGATATTGGA<br>AAATCCAAGAAATTACAACAAAAAAAAA<br>GAGA |
