# Supplementary material for: Fine mapping and identification of the fuzzless gene GaFzl in DPL972 (Gossypium arboreum)
Source: PubMed Central journal article supplement (PMC6647196; doi:10.1007/s00122-019-03330-3), 2019-04-02
Supplement: 122_2019_3330_MOESM8_ESM.pdf [file 122_2019_3330_MOESM8_ESM.pdf]

TableS7 Sequence information of qRT-PCR primers

| Primer Name | Product Length(bp) | ForwardPrimer (5'→3') | ReversePrimer (5'→3')  |
|-------------|--------------------|-----------------------|------------------------|
| q11941-2    | 137                | GTCTTCGGAACCCGGAGATG  | TCCCACTAGCAGCATTGACG   |
| q11941-3    | 114                | TGGGTGCTTTGAAGGCTTGT  | CTGACATGCTTGGTGACCCT   |
| q11942-1    | 126                | GGAGTTCGAGTTGATCAGCCA | TTGAGTACCGTTGTACGGC    |
| q11942-2    | 133                | TCCTGACCCGACGAGATTG   | CCCACCATACAAGCTGTTACAA |
